# Supplementary material for: Complete Mitochondrial Genome of Phoneutria Boliviensis (Araneae, Ctenidae): New Insights Into the Phylogeny and Evolution of Spider
Source: Research Square preprint supplement (doi:10.21203/rs.3.rs-936263/v1), 2021-09-30
Supplement: Supplementary file 1 [file a51661be1ab0388463bdde33.xlsx]

## Sheet: Plan1
Suborder			Family	Species	NCBI Ref ID	Size (pb)	%AT	A	C	G	T	AT skew	GC skew	AT/GC skew	Tandem repeats
Mesothelae (2)			Liphistiidae (2)	Liphistius erawan	NC_020323	337	78	119	43	31	144	-0.095057	-0.048	1.98035	No Repeats Found
				Heptathela hangzhouensis	AY309258	340	80.6	136	36	30	138	-0.00729927	-0.0229008	0.318735	No Repeats Found
Opisthothelae (74)	Mygalomorphae (5)		Nemesiidae (1)	Calisoga longitarsis	EU523754	478	66.3	158	56	105	159	-0.00315457	0.209402	-0.0150647	No Repeats Found
			Theraphosidae (2)	Aphonopelma hentzi	SRR13605914	NS	NS
				Cyriopagopus hainanus	MN877932	396	68.4	152	46	79	119	0.121771	0.170103	0.715867	No Repeats Found
				Ornithoctonus huwena	NC_005925	396	68.2	152	46	80	118	0.125926	0.195402	0.644444	No Repeats Found
			Dipluridae (1)	Phyxioschema suthepium	NC_020322	384	71.4	150	38	72	124	0.0948905	0.453333	0.209317	No Repeats Found
	Araneomorphae (69)	Haplogynae (14)	Dysderidae (3)	Dysdera silvatica	CM016944	540	78	204	49	70	217	-0.0308789	0.139073	-0.222034	No Repeats Found
				Parachtes romandiolae	NC_044099	779	73.2	298	97	112	272	0.045614	0.0590551	0.772398	No Repeats Found
				Harpactocrates apennicola	NC_044081	740	73.2	279	96	102	263	0.0295203	0.0410959	0.718327	(TAAATATAGATTATAAAATA)x2,3
			Hypochilidae (1)	Hypochilus thorelli	NC_010777	503	77.3	200	49	65	189	0.0282776	0.130081	0.217384	No Repeats Found
			Sicariidae (2)	Loxosceles rufescens	MK257773	1125	68.6	391	156	197	381	0.0129534	0.197115	0.0657146	(TGAATATATATAATAGATTTTTAGGTGAATCTACGATAGTCCCTCTAATCTATG)x3.6
				Loxosceles similis	NC_042902	851	73.1	310	101	128	312	-0.00321543	0.099631	-0.0322734	No Repeats Found
			Leptonetidae (0)	Appaleptoneta_fiskei	SRR13580909	NS	NS
				Calileptoneta_cokendolpheri	SRR13580908	NS	NS
				Ozarkia_georgia	SRR13580910	NS	NS
			Pholcidae (5)	Mesabolivar sp1	NC_040859	1109	68.4	366	145	205	393	-0.0355731	0.263158	-0.135178	(TTCTCTTGAATAAAGAGGGAACGACCGAGGATAGAAGAACGAAGTAGTGTTCAGAATACCGCTTTTTTTTTGAACAAAAACTTTTTCATTTTTGAAACTTTTTTTTTTTACTTGTAAGGCGGCGCGCCGCCTTGCGTTTCTGGTTAAATGGTATTTGTATTGTTAATAAGCCAGAATACCCCTTTATGTTGAAATGTTTTGAGATGATAAATGTGGAATTTGAATTTTCTCAAAAAAGGGCCTTTTACTAGTTGGAAATGAAGAAAATAT)x3,2
				Mesabolivar sp2	NC_040860	1109	64.5	380	159	232	338	0.0584958	0.308017	0.189911	(AGACGGAGGAGCGCTAGTAGGAGCGAGAGCAGAATGGGTACCTAGGACCTACCGCTACTTTTTTGTAAAAAGTTTTTGTCATTTTTTGAAAGAATTTTTTTATACTAATAAGCGGCTAGCCGCCCTTGGGATTCCCGTTTAATAAGTATGGTATTAATATGTAAGCAAGTATAGCAAAAATGTTGAAATTTTTATAGGTGATAAATGTGGAATTTGAATTTTCTCAAAAAAGGGCCTTTTACAAGGAGGAACAGAGAAAGAATTTACTCTCTAAAA)x3,1
				Mesabolivar sp3	NC_040861	1100	69.5	381	129	207	383	-0.0026178	0.40625	-0.00644382	(ATATTTCTCTTGAATAAAGAGGGAACGACCGAGGATAGAAGAACGAAGTAGTGTTCAGAATACCGCTTTTTTTTTGAACAAAAACTTTTTCATTTTTGAAACTTTTTTTTTTTACTTGTAAGGCGGCGCGCCGCCTTGCGTTTCTGGTTAAATGGTATTTGTATTGTTAATAAGCCAGAATACCCCTTTATGTTG)x2,2 and (AATATAGTAGTTTTACTCATAGAGCTTAGAATTGAAATTATAAGGAGGAGGCTATG)x4,4
				Pholcus phalangioides	NC_020324	1075	64.5	347	156	226	346	0.001443	0.336538	0.00428778	(TAAATCTCATAGGACTTTATAGGTAAAATTATAAGGATATCACTATGAGTATGTAAAGATTTACATAGGTAGTAATATGTATATAGATTTTA)x1,8 and (TAAATCTCATAGGACTTTATAGGTAAAATTATAAGGATATCACTATGAGTATGTAAAGATTTACATAGGTAGTAATATGTATATAGATTTTA)x2,8
				Pholcus sp	KJ782458	891	66.4	305	121	178	287	0.0304054	0.314917	0.0965505	(TAAATCTCATAGGACTTTATAGGTAAAATCGTAAGGATATCACTATGAGTATGTAAAGATTTACATAGGTAGCAATATATATATAGGTTTTA)x3,8
		Entelegynae (55)	Oecobiidae (1)	Uroctea compactilis	MH752074	587	76.1	226	75	65	140	0.234973	-0.0694444	-3.38361	No Repeats Found
			Tetragnathidae (3)	Tetragnatha nitens	NC_028068	944	71.5	350	121	148	325	0.037037	0.145946	0.253772	(AAATAAAAATTGTAAACTTGTACGCCTCCTGCCCCCTCCTTCACAAGGGGGCAAGGGGGCGGGCGCTTAAGTTATAAATATTATATATATATAATGATGTTGAGAAGACTATTGTATTACTATATGAGTTTTAAATCTATTTAAGTTGAGTAATACATAATATAATCAGCTAATTTATAG)x3,9
				Tetragnatha maxillosa	NC_025775	864	73.3	301	103	128	332	-0.0489731	0.14881	-0.3291	(ATTTATAATCTGTTCGCCTCCTCCCCCTCCTCACTTGGGGGAATGGAGGCGAGGACATTTTTATAAGAATTATATATATTTATAAGAGGATTTGGAAATTATTATATTACCTTTCAGGATTATAATATTTATTATATGTATGGTAATATATAATAATTAAGTTGTTGTATAC)x3,9
				Leucauge celebesiana	MN296353	377	83.3	151	26	37	163	-0.0382166	0.0375427	-1.01795	No Repeats Found
			Araneidae (15)	Araneus angulatus	NC_032402	649	71.3	256	84	102	207	0.105832	0.1	1.05832	(GATATATAAATTCTCATTATAAAGGATATCAATACTTATTTTATGTATAATGAGATACATCAAATATATA)x3
				Araneus ventricosus	NC_025634	1041	75.2	396	101	157	387	0.0114943	0.554455	0.0207307	(TATGTAAATTTTACATATATATTACTACTACTACTGAGTAATCTGAGATGCTATTATGGAGGGGGAATAATATTCAAGTACCAGCAATATGATATATATATATATA)x2,6 and (TATGTAAATTTTACATATATATTACTACTACTACTGAGTAATCTGAGATGCTATTATGGAGGGGGAATAATATTCAAGTACCAGCAATATGATATATATATATATA)x2
				Argiope amoena	NC_024282	586	83.1	262	49	50	225	0.0759754	0.00909091	8.35729	(ATATAT)x33,3
				Argiope bruennichi	NC_024281	509	75.6	197	50	74	188	0.0233766	0.222222	0.105195	No Repeats Found
				Argiope perforata	NC_044695	451	79.2	174	42	52	183	-0.0252101	0.0740741	-0.340336	No Repeats Found
				Cyclosa argenteoalba	NC_027682	1052	68.9	367	157	170	358	0.0124138	0.0590909	0.21008	(TATAAA)x4,3 and (CATGATTATTATTTTATTAAAAATAGATTCTTATAACTGATGTCAGTTAAATGAGGAGGGGGGGTGGAACCCCAAAGTTCTGACCCCCCCCCTTCCTCTCTCTTTTACTAAATAGAAGATGT)4,2
				Cyclosa japonica	NC_044696	1145	69.3	404	163	189	389	0.0189155	0.0981132	0.192793	(TATTTAATATTTACATGAATATAAATATATGTCCATCGAAATGAGGGAGGGGGAGGTGGAACCCT CAAAGTTCTGACCTCCCCCCCTACCCTCTCTCTTTTTATTAAAAGGGGGATGTCATGAGTAATATAATATTTAAAATATATTAAATGAATACTCTCATCTCCTGTTTTTGATTAGGTAAGGATAATAATGAGAG)x4,1
				Cyrtarachne nagasakiensis	NC_028077	812	73.4	310	97	119	286	0.0402685	0.117021	0.344112	No Repeats Found
				Cyrtophora moluccensis	KM820884	700	73.4	286	77	119	256	0.0553506	0.270968	0.20427	(CTAAATCTTGTAAGGAAAATCGTTACCTACTACAGAAGATTCTGACATGCGATTATGGGTAGTAACAAATGGAAAAATTGGTTAAAAATAGAGTTTTTTTTTTTAAAAATTAAGC)x3,9
				Hypsosinga pygmaea	NC_028078	647	77.4	276	63	83	225	0.101796	0.183486	0.55479	No Repeats Found
				Neoscona adianta	NC_029756	566	75.3	222	62	78	204	0.0422535	0.110345	0.382923	(TATACAAAGAATAAATGATTATTAAATCATGTCAT)x1,9
				Neoscona multiplicans	NC_044653	483	77.2	207	47	63	166	0.10992	0.137931	0.796917	(AT)x14,5
				Neoscona nautica	NC_029755	455	79.3	190	42	52	171	0.0526316	0.0813008	0.647368	(AAAAAAAATG)x2,8
				Neoscona scylla	NC_044101	508	78.5	213	49	60	186	0.0676692	0.0748299	0.904306	(GAAAAAAATT)x2,8
				Neoscona theisi	NC_026290	559	79.6	233	45	69	114	0.342939	0.1875	1.82901	(TTGAAAAAAA)x3
			Nephilidae (1)	Trichonephila clavata	NC_008063	670	91.2	285	62	64	259	0.0477941	0.0104167	4.58824	(CCCCCCCCCCCA)x2,5 and (ATATATAT)x47,6
			Agelenidae (1)	Agelena silvatica	NC_033971	598	80.9	220	49	65	264	-0.0909091	0.0733945	-1.23864	No Repeats Found
			Cybaeidae (1)	Argyroneta aquatica	NC_026863	2047	78.2	745	165	267	806	-0.0393295	0.344595	-0.114133	(ATAAAAACTTATCCCAAATTCTATGTTAAATATGGAGTGAAAACTTTTTAGTGTGGAACTTTTTTTCATGTAAAAATAAATGTATATCAACTATAAATTTCCGCTATTTCTCCATTTTATTATTTTTTTAAAAAA)x6 and (TTGAGATGAAAAATAATAGATAATTGTAAAGTTATTTATAATGATATAGTGAATGGTTCCAGTTAATTGAATAAAAAGATTCTTTTGTTAGGCCCTCCCTTTCCTAAAAAAGGGAAAGGGGAAGGGCCTAGAAGAGAAGGGTTACTTTAATATATTTGATATGATTATGAGGATTAATGAAGATTTTTTGTGATTGTGATTTAGATAATTTTATTATTTTTAAGTGAAAAATAATTGGATGAGTTTGTATACAT…
			Eutichuridae (1)	Cheiracanthium triviale	MN334527	983	77	360	130	96	397	-0.0488771	-0.122302	0.399643	(AT)x19
			Amaurobiidae (0)	Amaurobius fenestralis	MT862432	NS	NS
			Selenopidae (1)	Selenops bursarius	NC_024878	630	79.2	221	70	61	278	-0.114228	-0.028125	4.06146	(AAAAATTATTTATTAAAAAAA)x 2,8
			Salticidae (11)	Bavia aericeps	SRR12832794	634	81.4	228	60	58	288	-0.116279	-0.00740741	15.6977	No Repeats Found
				Carrhotus xanthogramma	NC_027492	900	80	359	87	93	361	-0.00277778	0.0288462	-0.0962963	No Repeats Found
				Cheliceroides longipalpis	NC_041120	657	80	264	55	63	275	-0.0204082	0.0444444	-0.459184	No Repeats Found
				Epeus alboguttatus	NC_042829	968	82.6	357	66	102	443	-0.1075	0.209302	-0.513611	(TTAATTAATAAATAATATTTAATTTTATTTTCAAATTAAAACATAATAAAAATTAATTTTCATGATTTATATAAATTGAAACAAATGAAGTTTTGCATTTTATTTTAATCATAGGTATTAAATCATATTTTTAGGAGGCCCCTGGCCCCAAAAAAGGGGCCTCCAGAAAAAAAGAGTAATATGAATTACCTATGATTAAACTTAAAAGTTGTTTATCTTGATTTATATTAATATATATTGAATAATGTAATTAAAATTTAATTTTATTGATTTTTATTTTTTTTGAGATTGATTTTGATATTATTATAATTTGTATTTTTTGT)x2
				Habronattus oregonensis	AY571145	715	77.1	257	73	91	294	-0.0671506	0.246575	-0.272333	No Repeats Found
				Maripanthus draconis	SRR12832802	711	82.8	287	44	78	302	-0.0254669	0.772727	-0.0329572	(TTTAAATAATATATATAATATTATTTAAA)x2,7
				Padillothorax badut	SRR12832803	421	78.9	148	43	46	184	-0.108434	0.0697674	-1.55422	No Repeats Found
				Plexippus paykulli	NC_024877	658	78.7	256	57	83	262	-0.011583	0.45614	-0.0253935	No Repeats Found
				Phidippus johnsoni	SRR12832797	669	80.1	252	64	69	284	-0.0597015	0.078125	-0.764179	No Repeats Found
				Piranthus planolancis	SRR12832799	697	78.8	263	67	81	286	-0.0418944	0.0853659	-0.490762	(ATAATATATATATTTATAAT)x2,5
				Telamonia vlijmi	NC_024287	695	80.5	343	90	98	434	-0.117117	0.0283688	-4.12838	(ATATTTTTATTTTTGAATTCACATTCTATTGTCAAATAAATTTAACAATAGAATTTATTGCTTATTATTATAAATTCAATCTTAATCATTAGTAATAGGTATAAATCATATTTTTGGGAGGCCCCTTGGCCCCAAAAAAAGGGGCCTCCGAAAAAGAAAAAGACATTGATTACCTATGATTACACTTGAAAGTAATTTACTCTTTTTGTTTTTAATATATATTTATATATTTATTCATAGGTATTTTTATTATTATTCTATTTTAATTGTTACTATAATATATATATATATATAAATATATATTTAATATTATTTATTATTTAATG)x1,9
			Thomisidae (2)	Oxytate striatipes	NC_025557	489	70.6	154	61	83	191	-0.107246	0.125714	-0.853096	No Repeats Found
				Ebrechtella tricuspidata	KU852748	859	70.9	287	120	130	322	-0.0574713	0.0833333	-0.689655	No Repeats Found
			Pisauridae (2)	Dolomedes angustivirgatus	NC_031355	1084	75.8	409	93	169	413	-0.00486618	0.817204	-0.00595467	(TTATTTTTAATCTTGAATAAATCTCTCTAGGCCCCCGAGTAGGGGGAGATCGGGGGCCTAGGGGAGAAATAATATGTATAGATAGAGAGGTGAGTTGTTATTCTTGATGATAATGAATATTGATATATATTAATATATATAATTATTGATAATATGAACTCATTTATCTTCTAATAGTAGTACGAATCTTTCAATGAGTATATAATATAACATATTATGTATAGAATAAATATTATTGTAATAATATATTAGTAAAGTATTGAGAC)x3,1
				Pisaura mirabilis	MT862414	1014	78.6	339	64	131	378	-0.0543933	1.04688	-0.0519578	(AACTTATCTCAAATTCTATGTTAAATATGGAGTGAAAACTTTTTAGTGTGGAACTTTTTTTCATGTAAAAATAAATGTACACCAACTATAAATTTCCGCTATTTCTCCATTTTATTATTTTTTTAAAAAAATAAA)x2,6
			Lycosidae (3)	Pardosa laura	NC_025223	774	71.8	282	70	148	274	0.0143885	1.11429	0.0129127	(ATATATTCTATACTTATTTACATAGAGGATGGAATATCCGTCCAGGCCCCGGTGGGGGGAAAAACCGGGGCCTGGGGAGGAAACGAATGTATATAATCGTAGAGATGAATATAAATGGAGTGTAGTATTATATATGTATATAATTATTATTATTATTGTTGTTTGTTCTCATGATTTATAGAGAGAGGATGAGATGGGTGAGAACATATTATGA)x2
				Pirata subpiraticus	NC_025523	868	65.7	265	98	200	305	-0.0701754	1.04082	-0.0674235	(GATTGTCATATCCGTCCAGGCCCCGGTGGTGGGGAAAACCGGGGCCTGGGGGGGAAACGTATATATATAATACTAGGAGGGGATGGTTATAGGAGGGTTGTATTATATATGTATATATTTATGATTATTGATTTCTTGTTCTCATGATTTGTCAGGGAGGAGATTAAATATGGTGAGAACATATTATGAATATAATTATGGTTATTTATAGG)x2,8
				Wadicosa fidelis	NC_026123	1071	67.9	347	94	250	380	-0.045392	1.65957	-0.0273516	(TTTAGTATATTGTGTATATAATTATGTTTATTGTATTCTTTGTTCTCATTATTTGTAGGAGAGGGGATAGGATAAGGTGAGAACTATGAATATATATAATTTATTATTATATAAGGGTGTAATATTCGCCGGGGCCCCGGCGGAGGGGGAAAAGCCGGGGACCCTGAGAGGAAATAAGTATATATATATGAATGTAATTAAAGGATGATATGGAG)x3,4
			Oxyopidae (3)	Oxyopes hupingensis	NC_046736	1500	77.3	546	131	210	613	-0.0578085	0.603053	-0.0958596	(TATTTTTATTTAAGGATAAATATCTTTCAGGCCCGATAGCGGGAAAAATCGGGCCTGAGAAGAAAGATCTTAATATCCTTGAAGTACAATATAATTAAAGTTTGAATTTTAATTAATATAGGAGTATTATTATATATATTTATATTAATTTATAGGACTCATTCTAATTATATGTTAAATTATTTTCTTTAGAATGAGTCTATGTAAGTATTATAATATATTACATATATGAAATTGTTATTAATGTGTTGTTTC)x4,6
				Oxyopes licenti	MT741489	840	77.6	268	67	121	383	-0.176651	0.80597	-0.219178	(CTTTATGGGGATTGCATTTGTATAGTAGTAACTTCTTTAATCTATATCTTCTTAATAGAATAGATTTTTCAGGCCCGATAGCTGGGGAAAATCGGGCCTGGGAAAATAATATCTATACTATTTATAGTAGTATTGTTATTGGGTTTGGTATTTTTAATAAAGTTATTGTGTAATTACATATATATTTTTTAATAATATGTTATACTCATTCTAAGTGTTGTTATCATTATTTACTTTAGAATGAGTATATGTTTGTGTA)x2
				Oxyopes sertatus	NC_025224	837	77.7	262	62	125	388	-0.193846	1.01613	-0.190769	No Repeats Found
			Ctenidae (4)	Anahita punctulata	SRR10414003	676	75.6	255	59	106	256	-0.00195695	0.79661	-0.00245659	(GTATTAATGTATATGGTATATA)x2
				Ctenus hibernalis	SRR10413993	NS	NS
				Ctenus captiosus	SRR10413998	NS	NS
				Ctenus exlineae	SRR10414004	NS	NS
				Cupiennius salei	SRR880446	NS	NS
				Isoctenus ordinario	SRR10413992	NS	NS
				Leptoctenus byrrhus	SRR10413987	689	74.3	224	80	97	288	-0.125	0.2125	-0.588235	(AATTTTTAAAAATTTTTTA)x2,7
				Phoneutria boliviensis		1103	71.7	363	120	192	428	-0.0821745	0.6	-0.136957	(ATTTTTCGCG)x15,5 and (CGGAATTGAATTTCAAATAGAAATACTAAAACAGTCTGTTTTAATACTTTTTTTCAGGGCCCCCGGCGTTTGAGAAACGGGGGCCTCTGAAAGAAAAAAAAAAGTATGTATGAATGAACATAGAATTATTAATGAAATGAAAGATCTTAAGGTTAAATATATATTTTATTAATTATAATAAGAAACTCATCTATTGAATGTAGAGGTATTTTGTATAGAGAGTAATATACATCTCTATTGAATTTGAATT)x2,1 and (TTATTCATTTAAAAAAT)x2
				Phoneutria nigriventer	SRR10413989	709	75.2	245	62	114	288	-0.0806754	0.83871	-0.0961899	(ATTTTTCGCG)x7,6
				NS: Non Sequence
